# Supplementary material for: Antitumor effects of the GM3(Neu5Gc) ganglioside-specific humanized antibody 14F7hT against Cmah-transfected cancer cells
Source: PubMed Central journal article supplement (PMC6616363; doi:10.1038/s41598-019-46148-1), 2019-07-09
Supplement: 41598_2019_46148_MOESM1_ESM.pdf [file 41598_2019_46148_MOESM1_ESM.pdf]

**TITLE:** Antitumor effects of the GM3(Neu5Gc) ganglioside-specific humanized antibody 14F7hT against *Cmah*-transfected cancer cells.

**Running title:** Targeting of GM3(Neu5Gc)-expressing *Cmah*-transfected cells by a humanized antibody.

**AUTHORS:** Denise Dorvignit<sup>1</sup>, Kayluz F. Boligan<sup>2</sup>, Ernesto Relova-Hernández<sup>1</sup>, Marilyn Clavell<sup>1</sup>, Armando López<sup>3</sup>, Mayrel Labrada<sup>1</sup>, Hans-Uwe Simon<sup>2</sup>, Alejandro López-Requena<sup>1§</sup>, Circe Mesa<sup>1\*#</sup>, Stephan von Gunten<sup>2\*</sup>

**ADDRESSES:** <sup>1</sup>Immunobiology Division, Center of Molecular Immunology, Havana 11600, Cuba; <sup>2</sup>Institute of Pharmacology, University of Bern, Bern 3010, Switzerland; <sup>3</sup>Animal House Department, Center of Molecular Immunology, Havana 11600, Cuba.

<sup>§</sup> Current address: Ablynx, Technologiepark 21, 9052 Zwijnaarde, Belgium.

\*contributed equally to this work

# Corresponding author:  
Circe Mesa, PhD  
Center of Molecular Immunology  
P.O.Box 16040, Havana 11600,  
Cuba.  
Fax: (537)-2720644  
Email: [circe@cim.sld.cu](mailto:circe@cim.sld.cu)

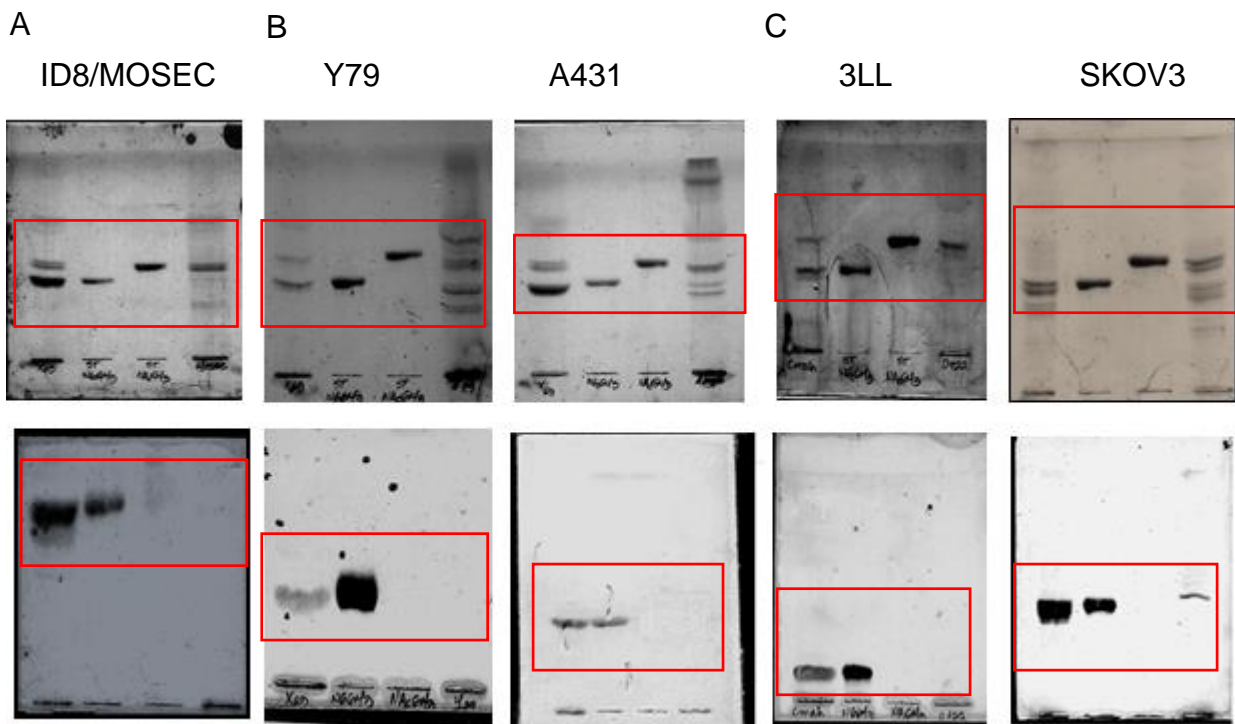

**Supplementary figure 1. Original scans of HPTLC plates.** Uncropped scans corresponding to images shown in Figure 1B (A), Figure 2B (B) and Figure 4B (C). Upper panels: orcinol staining; bottom panels: 14F7 immunostaining.

**A**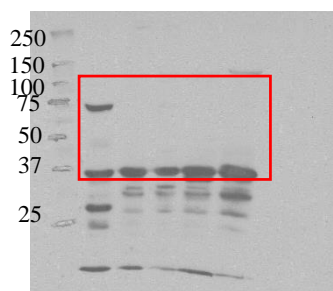**B**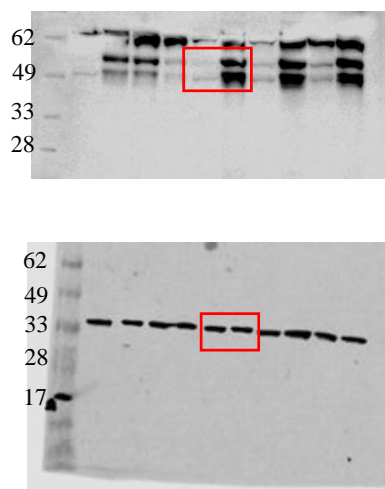**C**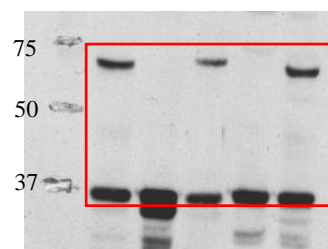

**Supplementary figure 2. Original scans of Western blots.** Uncropped scans corresponding to images shown in Figure 1C (A), Figure 3A (B) and Figure 4A (C).

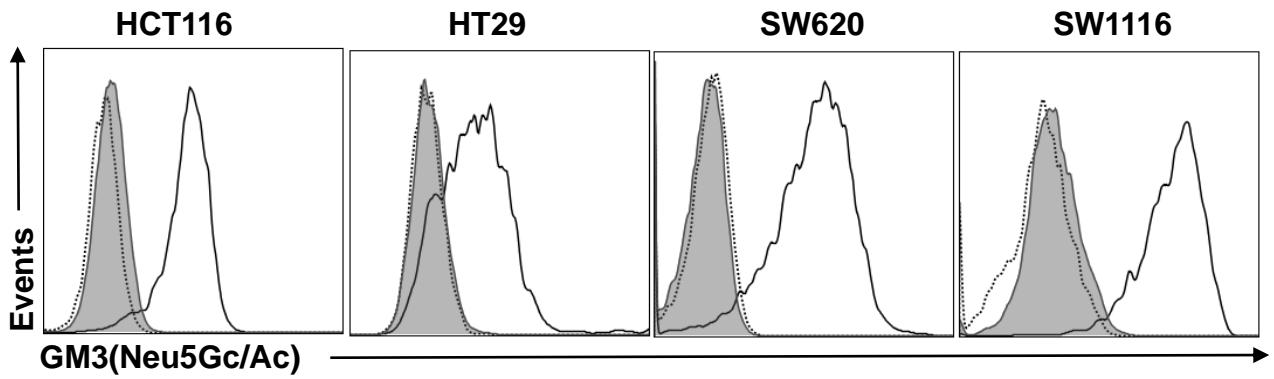

**Supplementary figure 3. GM3(Neu5Gc) expression in human colon cancer cell lines.** Cells were stained with 10  $\mu\text{g}/\text{mL}$  of 14F7hT (filled histogram), 7C1 (black line) or isotype-matched control antibody (itolizumab, dotted line) followed by a PE-conjugated anti-human IgG+IgM antiserum. Data are representative of two independent experiments.

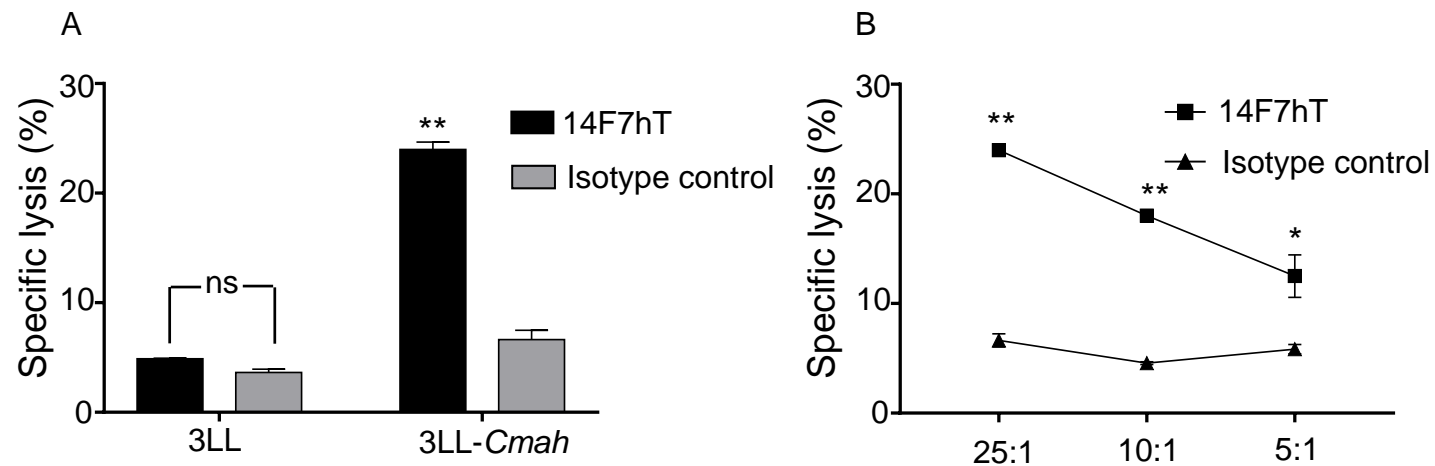

**Supplementary figure 4. 14F7hT-induced antibody-dependent cell-mediated cytotoxicity in recombinant CMAH-expressing cell lines.** A) Induction of antibody-dependent cell-mediated cytotoxicity (ADCC) by 14F7hT with human PBMC in the mouse *Cmah*-transfected cell line 3LL-*Cmah*. Cells were stained with CFSE and cytotoxicity was measured using TO-PRO-3 dye by flow cytometry assay. PBMC from human healthy donors were used as effector cells. B) Cytotoxicity was evaluated at different effector:target cell ratios. Isotype-matched antibody (infliximab) was used as negative control. Statistical analysis was performed using Mann-Whitney *U* test. Data are representative of two independent experiments.

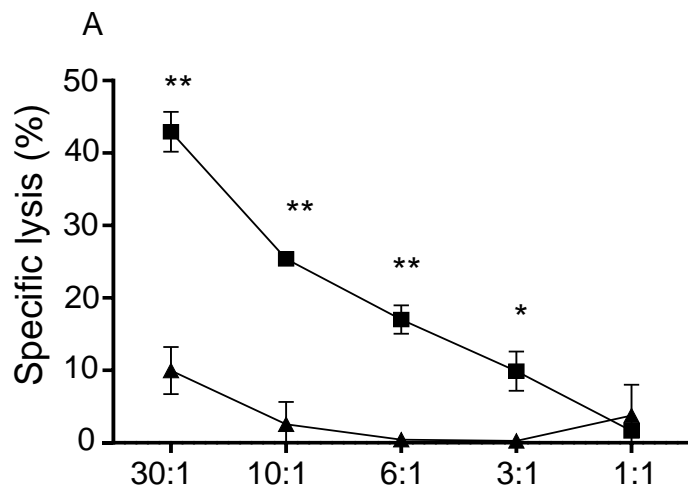

**Supplementary figure 5. 14F7hT-opsonized 3LL-*Cmah* cells induce NK cells activation.** A) Induction of antibody-dependent cell-mediated cytotoxicity (ADCC) by 14F7hT in the mouse *Cmah*-transfected cell line 3LL-*Cmah*. Cytotoxicity was measured by an LDH-release assay. NK cells from human healthy donors were used as effector cells. Cytotoxicity was evaluated at different effector:target cell ratios. Isotype-matched antibody (infliximab) was used as negative control. Statistical analysis was performed using Mann-Whitney *U* test. Data are representative of three independent experiments.

**Supplementary table 1: Anti-ganglioside antibodies used in this study**

| Antibody | Isotype              | Origin                                                          | Specificity                | Antigen source                                  | Assays                                         | Affinity             | Structural data        | Selected references |
|----------|----------------------|-----------------------------------------------------------------|----------------------------|-------------------------------------------------|------------------------------------------------|----------------------|------------------------|---------------------|
| 14F7     | mouse IgG1, $\kappa$ | immunized BALB/c mouse                                          | GM3(Neu5Gc)                | mouse, horse,<br>human <sup>a</sup> , synthetic | ELISA,<br>HPTLC, FACS,<br>IHC, RIS             | 2-25 nM <sup>b</sup> | Fab, scFv <sup>c</sup> | 1-9                 |
| 14F7hT   | human IgG1, $\kappa$ | 14F7 humanized by<br>disruption of predicted T<br>cell epitopes | GM3(Neu5Gc)                | mouse, horse,<br>human <sup>a</sup>             | ELISA,<br>HPTLC, FACS,<br>IHC                  | ND                   | ND                     | 10-12               |
| 7C1      | human IgG1, $\kappa$ | 14F7hT binding site<br>engineered for extended<br>specificity   | GM3(Neu5Gc)<br>GM3(Neu5Ac) | mouse, horse<br>mouse, dog, human               | ELISA,<br>HPTLC, FACS<br>ELISA,<br>HPTLC, FACS | ND                   | ND                     | 11, 13              |

<sup>a</sup>Tumor tissues.

<sup>b</sup>Measured by non-competitive ELISA.

<sup>c</sup>14F7 VH with alternative VL.

HPTLC: high-performance thin layer chromatography; IHC: immunohistochemistry; RIS: radioimmunosciintigraphy; ND: not determined.

## References

1. Carr, A. *et al.* A mouse IgG1 monoclonal antibody specific for N-glycolyl GM3 ganglioside recognized breast and melanoma tumors. *Hybridoma* **19**, 241-247, <https://doi.org/10.1089/02724570050109639> (2000).
2. Krenzel, U. *et al.* Structure and molecular interactions of a unique antitumor antibody specific for N-glycolyl GM3. *J Biol Chem* **279**, 5597-5603, <https://doi.org/10.1074/jbc.M311693200> (2004).
3. Rojas, G. *et al.* Light-chain shuffling results in successful phage display selection of functional prokaryotic-expressed antibody fragments to N-glycolyl GM3 ganglioside. *J Immunol Methods* **293**, 71-83, <https://doi.org/10.1016/j.jim.2004.07.002> (2004).
4. Oliva, J. P. *et al.* Clinical evidences of GM3 (NeuGc) ganglioside expression in human breast cancer using the 14F7 monoclonal antibody labelled with (99m)Tc. *Breast Cancer Res Treat* **96**, 115-121, <https://doi.org/10.1007/s10549-005-9064-0> (2006).
5. Roque-Navarro, L. *et al.* Anti-ganglioside antibody-induced tumor cell death by loss of membrane integrity. *Mol Cancer Ther* **7**, 2033-2041, <https://doi.org/10.1158/1535-7163.MCT-08-0222> (2008).
6. Labrada, M. *et al.* Direct validation of NGcGM3 ganglioside as a new target for cancer immunotherapy. *Expert Opin Biol Ther* **10**, 153-162, <https://doi.org/10.1517/14712590903443084> (2010).
7. Lahera, T. *et al.* Prognostic Role of 14F7 Mab Immunoreactivity against N-Glycolyl GM3 Ganglioside in Colon Cancer. *J Oncol* **2014**, 482301, <https://doi.org/10.1155/2014/482301> (2014).
8. Blanco, R. *et al.* Prognostic Significance of N-Glycolyl GM3 Ganglioside Expression in Non-Small Cell Lung Carcinoma Patients: New Evidences. *Patholog Res Int* **2015**, 132326, <https://doi.org/10.1155/2015/132326> (2015).
9. Bjerregaard-Andersen, K. *et al.* Crystal structure of an L chain optimised 14F7 anti-ganglioside Fv suggests a unique tumour-specificity through an unusual H-chain CDR3 architecture. *Sci Rep* **8**, 10836, <https://doi.org/10.1038/s41598-018-28918-5> (2018).
10. Fernandez-Marrero, Y. *et al.* A cytotoxic humanized anti-ganglioside antibody produced in a murine cell line defective of N-glycolylated-glycoconjugates. *Immunobiology* **216**, 1239-1247, <https://doi.org/10.1016/j.imbio.2011.07.004> (2011).
11. Casadesus, A. V. *et al.* A shift from N-glycolyl- to N-acetyl-sialic acid in the GM3 ganglioside impairs tumor development in mouse lymphocytic leukemia cells. *Glycoconj J* **30**, 687-699, <https://doi.org/10.1007/s10719-013-9473-y> (2013).
12. Blanco, R. *et al.* Immunodetection of N-glycolyl GM3 ganglioside in lung carcinoma by immunohistochemistry: a technical study using frozen and formalin-fixed and paraffin-embedded tissues. *Acta Microscopica* **23**, 199-213 (2014).
13. Rojas, G., Pupo, A., Gomez, S., Krenzel, U. & Moreno, E. Engineering the binding site of an antibody against N-glycolyl GM3: from functional mapping to novel anti-ganglioside specificities. *ACS Chem Biol* **8**, 376-386, <https://doi.org/10.1021/cb3003754> (2013).
